# Supplementary material
Source: Springer Nature journal article supplement (https://www.springermedizin.de/resource/supplementary/12937_2010_310_MOESM5_ESM.pdf/25654842)
Supplement: MOESM5 [file 25654842]

**Table 5. Immunomodulatory Polysaccharide Products: Composition and Structure**

| Source                                                                                                                                                                               | Category                     | Features                                                                                                                                                                                                                                                                                   | MW                                                                             | Monosaccharide composition                                                                                                    | Reference                                  |
|--------------------------------------------------------------------------------------------------------------------------------------------------------------------------------------|------------------------------|--------------------------------------------------------------------------------------------------------------------------------------------------------------------------------------------------------------------------------------------------------------------------------------------|--------------------------------------------------------------------------------|-------------------------------------------------------------------------------------------------------------------------------|--------------------------------------------|
| <i>Agaricus subrufescens</i> ( <i>A. blazei</i> )                                                                                                                                    | Extract                      | $\beta$ -1,6-D-glucan                                                                                                                                                                                                                                                                      | 10,000                                                                         | NA                                                                                                                            | [66]                                       |
| <i>Agaricus subrufescens</i> (fruit body)                                                                                                                                            | Extract                      | $\alpha$ -1,6- and $\alpha$ -1,4 glucans with $\beta$ -1,6-glucopyranosyl backbone (629.2 mcg/mg polysaccharides, 43.5 mcg/mg protein)                                                                                                                                                     | 170,000                                                                        | glucose                                                                                                                       | [24]                                       |
|                                                                                                                                                                                      |                              | $\alpha$ -1,4 glucans & $\beta$ -1,6 glucans with $\beta$ -1,3 side branches; $\alpha$ -1,6 glucans; $\beta$ -1,6; 1-3 glucans, $\beta$ -1,4 glucans; $\beta$ -1,3 glucans; $\beta$ -1,6; $\alpha$ -1,3 glucans; riboglucans, galactoglucomannans, $\beta$ -1,2; $\beta$ -1,3 glucomannans | NA                                                                             | glucose, mannose, galactose, ribose                                                                                           | [25,117,118]                               |
| <i>Agaricus subrufescens</i> (mycelia)                                                                                                                                               | Extract (ATOM)               | $\beta$ -1,6-D-glucan, protein complex, 5% protein                                                                                                                                                                                                                                         | 100,000-1,000,000                                                              | glucose, mannose, galactose, ribose                                                                                           | [93]                                       |
| <i>Aloe barbadensis</i> (leaf gel)                                                                                                                                                   | Whole tissue                 | Dry weight: 10% polysaccharides; acemannan, aloemannan, aloeride, pectic acid, galactans, arabinans, glucomannans                                                                                                                                                                          | average 2,000,000                                                              | mannose, glucose, galactose, arabinose, xylose, rhamnose                                                                      | [119,120]                                  |
|                                                                                                                                                                                      | Extract (aloemannan)         | neutral partially acetylated glucomannan, mainly $\beta$ -1, 4-                                                                                                                                                                                                                            | >200,000                                                                       | mannose, glucose                                                                                                              | [121]                                      |
|                                                                                                                                                                                      | Extract (aloeride)           | NA                                                                                                                                                                                                                                                                                         | 4,000,000-7,000,000                                                            | 37 % glucose, 23.9% galactose, 19.5% mannose, 10.3% arabinose                                                                 | [122]                                      |
|                                                                                                                                                                                      | Extract (acemannan)          | $\beta$ -1,4 acetylated mannan                                                                                                                                                                                                                                                             | 80,000                                                                         | mannose                                                                                                                       | [123]                                      |
| <i>Aloe barbadensis</i> , (leaf gel), <i>Larix</i> sp. (bark), <i>Anogeissus latifolia</i> (bark), <i>Astragalus gummifer</i> (stem), <i>Oryza sativa</i> (seed), <i>glucosamine</i> | Extracts (Ambrotose® powder) | $\beta$ -1,4 acetylated mannan, arabinogalactans, polysaccharide gums, rice starch, 5.4% protein                                                                                                                                                                                           | 57.3 % $\geq$ 950,000; 26.4 % <950,000 and $\geq$ 80,000 ; 16.3% $\leq$ 10,000 | mannose, galactose, arabinose, glucose, galacturonic acid, rhamnose, xylose, fructose, fucose, glucosamine, galacturonic acid | (unpublished data, Mannatech Incorporated) |

|                                                                                                                                                                                                                        |                                         |                                                                                                                                          |                                                                                    |                                                                    |          |
|------------------------------------------------------------------------------------------------------------------------------------------------------------------------------------------------------------------------|-----------------------------------------|------------------------------------------------------------------------------------------------------------------------------------------|------------------------------------------------------------------------------------|--------------------------------------------------------------------|----------|
| <i>Aloe barbadensis</i> (leaf gel), <i>Larix</i> sp. (bark), <i>Undaria pinnatifida</i> (frond), <i>Anogeissus latifolia</i> (bark), <i>Astragalus gummifer</i> (stem), <i>Oryza sativa</i> (seed), <i>glucosamine</i> | Extracts (Advanced Ambrotose® powder)   | $\beta$ -1,4 acetylated mannan, arabinogalactans, polysaccharide gums, fucoidans, rice starch, 6% protein, 1% fatty acids                | 13% = 1,686,667; 46% = 960,000 30 % <950,000 and $\geq$ 70,000; 11 % $\leq$ 10,000 |                                                                    |          |
| <i>Avena</i> spp. (seed endosperm)                                                                                                                                                                                     | Extract                                 | $\beta$ -1,3;1,4 particulate (1-3 $\mu$ ) glucans                                                                                        | 1,100,000                                                                          | glucose                                                            | [43]     |
| <i>Avena</i> spp. (seed)                                                                                                                                                                                               | Extract                                 | $\beta$ -1,4,1,3 particulate glucans (linear chains of $\beta$ -D-glycopyranosyl units; 70% $\beta$ 1-4 linked)                          | 2,000,000                                                                          | NA                                                                 | [41,124] |
| <i>Buplerum falcatum</i> (root)                                                                                                                                                                                        | Extract (bupleuran 2IIc)                | 6 linked galactosyl chains with terminal glucuronic acid substituted to $\beta$ -galactosyl chains                                       | NA                                                                                 | galactose, glucuronic acid, rhamnose                               | [35]     |
| Citrus spp. (fruit)                                                                                                                                                                                                    | Extract                                 | $\alpha$ -1,4-linked partially esterified D-anhydrogalacturonic acid units interrupted periodically with 1,2-rhamnose                    | 70,000-100,000                                                                     | galactose, galacturonic acid, arabinose, glucose, xylose, rhamnose | [125]    |
| <i>Cladosiphon okamuranus</i> (frond)                                                                                                                                                                                  | Extract                                 | $\alpha$ -1,3-fucopyranose sulfate                                                                                                       | 56,000                                                                             | fucose:glucuronic acid (6.1:1.0)                                   | [126]    |
| <i>Cordyceps sinensis</i> (mycelia)                                                                                                                                                                                    | Extract                                 | $\beta$ -1,3-D-glucan with 1,6-branched chains                                                                                           | NA                                                                                 | NA                                                                 | [127]    |
| <i>Cyamopsis tetragonolobus</i> (seed)                                                                                                                                                                                 | Extract (guar gum)                      | Main chain of $\beta$ -1,4-mannopyranosyl units with $\alpha$ -galactopyranosyl units                                                    | 220,000                                                                            | mannose, galactose                                                 | [36,128] |
|                                                                                                                                                                                                                        | Extract (partially-hydrolyzed guar gum) | NA                                                                                                                                       | 20,000                                                                             | mannose, galactose                                                 | [50]     |
| <i>Flammulina velutipes</i>                                                                                                                                                                                            | Extract                                 | NA                                                                                                                                       | NA                                                                                 | glucose, mannose, galactose                                        | [117]    |
| <i>Flammulina velutipes</i> (fruit body)                                                                                                                                                                               | Extract                                 | $\beta$ -1,3 glucan                                                                                                                      | NA                                                                                 | glucose                                                            | [129]    |
| <i>Ganoderma lucidum</i>                                                                                                                                                                                               | Whole tissue                            | Linear $\beta$ -1,3-glucans with varying degrees of D-glucopyranosyl branching, $\beta$ -glucan/protein complexes, heteropolysaccharides | 400,000-1,000,000                                                                  | glucose, galactose, mannose, xylose, uronic acid                   | [130]    |
|                                                                                                                                                                                                                        | Extract                                 | NA                                                                                                                                       | 7,000-9,000                                                                        | NA                                                                 | [67]     |
| <i>Ganoderma lucidum</i> (fruit body)                                                                                                                                                                                  | Extract                                 | NA                                                                                                                                       | 7,000-9,000                                                                        | NA                                                                 |          |

|                                                 |                      |                                                                                                                             |                 |                                                                              |           |
|-------------------------------------------------|----------------------|-----------------------------------------------------------------------------------------------------------------------------|-----------------|------------------------------------------------------------------------------|-----------|
|                                                 |                      | $\beta$ -linked heteroglycan peptide                                                                                        | 513,000         | Fructose, galactose, glucose, rhamnose, xylose (3.167:0.556:6.89:0.549:3.61) | [15]      |
| <i>Ganoderma tsugae</i>                         | Extract              | 55.6% carbohydrates (12.5% polysaccharides); 12% triterpenes, 1.7% sodium, 0.28% protein, 0% lipid                          | NA              | NA                                                                           | [53]      |
| <i>Ginkgo biloba</i> (seed)                     | Extract              | 89.7% polysaccharides                                                                                                       | NA              | glucose, fructose, galactose, rhamnose                                       | [131]     |
| <i>Grifola frondosa</i>                         | Whole tissue         | $\beta$ -1,3; 1, 6-glucans, $\alpha$ -glucans, mannoxyloglucans, xyloglucans, mannogalactofucans                            | NA              | glucose, fucose, xylose, mannose, galactose                                  | [117]     |
| <i>Grifola frondosa</i> (fruit body)            | Extract (D fraction) | $\beta$ -1,6-glucan with $\beta$ -1,3 branches, 30% protein                                                                 | NA              | glucose                                                                      | [132]     |
|                                                 | Extract (X fraction) | $\beta$ -1,6-D-glucan with $\alpha$ -1,4 branches, 35% protein                                                              | 550,000-558,000 | glucose                                                                      |           |
| <i>Hordeum</i> spp. (seed)                      | Extract              | $\beta$ -1,3; 1,4-and $\beta$ -1,3;1,6-D-glucans                                                                            | 45,000-404,000  | glucose                                                                      | [75]      |
|                                                 |                      | Primarily linear $\beta$ -1,3;1,4- glucans                                                                                  | NA              | glucose                                                                      | [124]     |
| <i>Laminaria</i> spp. (frond)                   | Extract (laminarin)  | $\beta$ -1,3;1-6 glucan                                                                                                     | 7,700           | glucose                                                                      | [29]      |
|                                                 |                      | $\beta$ -1,3 glucan with some $\beta$ -1,6 branches and a small amount of protein                                           | 4,500-5,500     | glucose                                                                      | [44]      |
|                                                 | Extract              | Fucoidan                                                                                                                    | NA              | NA                                                                           | [133]     |
| <i>Larix occidentalis</i> (bark)                | Extract              | $\beta$ -1,3;1,6-D-galactans with arabinofuranosyl and arabinopyranosyl side chains                                         | 19,000-40,000   | galactose:arabinose (6:1), uronic acid                                       | [128,134] |
| <i>Lentinula edodes</i>                         | Extract (SME)        | $\beta$ -1,3-glucans (4-5%), $\alpha$ -1,4-glucan (8-10%), protein (11-14%)                                                 | NA              | glucose                                                                      | [80]      |
|                                                 | Extract              | $\beta$ -glucan                                                                                                             | 1,000           | glucose                                                                      | [27]      |
|                                                 | Whole tissue         | Linear $\beta$ -1,3-glucans, $\beta$ -1,4;1,6-glucans, heterogalactan                                                       | NA              | glucose, galactose, mannose, fucose, xylose                                  | [135]     |
|                                                 | Extract (lentinan)   | $\beta$ -1,3-glucan with 2 $\beta$ -1,6 glucopyranoside branchings for every 5 $\beta$ -1,3-glucopyranoside linear linkages | 500,000         | glucose                                                                      | [136]     |
| <i>Lentinula edodes</i> (fruit body)            | Extract (lentinan)   | Neutral $\beta$ -1,3-D glucan with two $\beta$ -1,6 glucoside branches for every five $\beta$ -1,3 units                    | 400,000-800,000 | glucose                                                                      | [137]     |
| <i>Lentinula edodes</i>                         | Extract (KS-2)       | Peptide units and mannan connected by $\alpha$ -glycosidic bonds                                                            | 60,000-90,000   | mannose, glucose                                                             |           |
| <i>Lentinula edodes</i> (mycelia or fruit body) | Extract              | Triple helical $\beta$ -1,3-D glucan with $\beta$ -1,6 glucoside branches                                                   | 1,000,000       | glucose                                                                      | [3]       |

|                                              |                                    |                                                                                                                       |            |                                                                                                                  |       |
|----------------------------------------------|------------------------------------|-----------------------------------------------------------------------------------------------------------------------|------------|------------------------------------------------------------------------------------------------------------------|-------|
| <i>Lentinula edodes</i><br>(mycelia)         | Extract (LEM)                      | 44% sugars, 24.6% protein                                                                                             | ~1,000,000 | xylose, arabinose, glucose,<br>galactose, mannose,<br>fructose                                                   | [3]   |
|                                              | Extract (PG101)                    | 72.4% polysaccharides, 26.2% protein, 1.4% hexosamine                                                                 | NA         | 55.6% glucose, 25.9%<br>galactose, 18.5% mannose                                                                 | [138] |
| <i>Lycium barbarum</i>                       | Whole tissue                       | $\alpha$ -1,4;1,6-D-glucans, lentinan, $\beta$ -1,3;1,6 heteroglucans,<br>heterogalactans, heteromannans, xyloglucans | NA         | glucose, galactose,<br>mannose, xylose                                                                           | [139] |
| <i>Lycium barbarum</i><br>(fruit body)       | Extract (LBP <sub>3p</sub> )       | 88.36% sugars, 7.63% protein                                                                                          | 157,000    | galactose, glucose,<br>rhamnose, arabinose,<br>mannose, xylose (molar<br>ratio of<br>1:2.12:1.25:1.10:1.95:1.76) | [91]  |
| <i>Panax quinquefolium</i><br>(root)         | Extract                            | Poly-furanosyl-pyranosyl saccharides                                                                                  | NA         | arabinose, galactose,<br>rhamnose, galacturonic<br>acid, glucuronic acid                                         | [33]  |
|                                              |                                    | NA                                                                                                                    | NA         | glucose, mannose, xylose                                                                                         | [140] |
|                                              | Extract<br>(Cold-FX <sup>®</sup> ) | 90% poly-furanosyl-pyranosyl-saccharides                                                                              | NA         | furanose                                                                                                         | [20]  |
| <i>Phellinus linteus</i> (fruit<br>body)     | Extract                            | $\alpha$ - and $\beta$ -linked 1,3 acidic proteoglycan with 1,6 branches                                              | 150,000    | glucose, mannose,<br>arabinose, xylose                                                                           | [141] |
| <i>Phellinus linteus</i><br>(mycelia)        | Extract                            | 83.2% polysaccharide (4.4% $\beta$ -glucan), 6.4% protein, 0.1%<br>fat                                                | NA         | glucose                                                                                                          | [142] |
| <i>Pholiota nameko</i> (fruit<br>body)       | Extract (PNPS-1)                   | NA                                                                                                                    | 114,000    | mannose, glucose,<br>galactose, arabinose, xylose<br>(molar ratio of<br>1:8.4:13.6:29.6:6.2)                     | [55]  |
| <i>Pleurotus ostreatus</i><br>(mycelia)      | Extract                            | $\beta$ -1,3;1,6-D-glucans                                                                                            | 316,260    | glucose                                                                                                          | [143] |
| <i>Saccharomyces cerevisiae</i>              | Extract (WGP)                      | Particulate $\beta$ -1,3;1,6-D-glucan                                                                                 | NA         | glucose                                                                                                          | [144] |
|                                              | Extract                            | $\beta$ -glucans with $\beta$ -1,6 branches with a $\beta$ -1,3 regions                                               | NA         | glucose                                                                                                          | [124] |
|                                              | Extract (SBG)                      | soluble $\beta$ -1,3-D-glucan with $\beta$ -1,3 side chains attached with<br>$\beta$ -1,6 linkages                    | 20,000     | glucose                                                                                                          | [145] |
| <i>Sclerotinia sclerotiorum</i><br>(mycelia) | Extract (SSG)                      | $\beta$ -1,3-D-glucan, <1% protein (>98% polysaccharide)                                                              | NA         | glucose                                                                                                          | [83]  |
| <i>Sclerotium rofsii</i>                     | Extract<br>(scleroglucan)          | $\beta$ -1,3;1,6 glucan                                                                                               | 1,000,000  | glucose                                                                                                          | [29]  |

|                                            |                                            |                                                   |         |                                                                                           |           |
|--------------------------------------------|--------------------------------------------|---------------------------------------------------|---------|-------------------------------------------------------------------------------------------|-----------|
| <i>Trametes versicolor</i><br>(fruit body) | Extract (PSP)                              | $\alpha$ -1,4, $\beta$ -1,3 glucans, 10% peptides | 100,000 | glucose, arabinose,<br>mannose, rhamnose                                                  | [146]     |
| <i>Trametes versicolor</i><br>(mycelia)    | Extract (PSK)                              | $\beta$ -1,4;1,3;1,6-D-glucans, protein           | 94,000  | glucose (74.6%), mannose<br>(15.5%), xylose (4.8%),<br>galactose (2.7%), fucose<br>(2.4%) | [137,147] |
| <i>Undaria pinnatifida</i><br>(sporophyll) | Extract                                    | Galactofucan sulfate                              | 9,000   | fucose:galactose 1.0:1.1                                                                  | [148]     |
|                                            |                                            | Galactofucan sulfate                              | 63,000  | fucose:galactose:gluc-<br>uronic acid (1.0:1.0:0.04)                                      | [149]     |
|                                            |                                            | $\beta$ -1,3-galactofucan sulphate                | 38,000  | fucose, galactose                                                                         | [150]     |
| Unidentified source                        | Extract (modified<br>citrus pectin)        | NA                                                | 10,000  | galactose, rhamnose, uronic<br>acid                                                       | [125]     |
|                                            | Extract (highly<br>methoxylated<br>pectin) | NA                                                | 200,000 | NA                                                                                        | [36]      |
